# Supplementary material
Source: publisher figshare collection journal article supplement (https://tandf.figshare.com/articles/dataset/_/3118504)
Supplement: Supplementary file 1 [file 2]

**Figure S1.** Western blots for downstream targets of MTOR signaling. (**A**) Representative images for phosphorylated (p-) and total (t)-EIF4EBP1 and RPS6KB. (**B-E**) Quantification data for male (**B and D**) and female (**C and E**) placentas from NW, OW and OB groups. Data presented as box-and-whisker plot, the bottom and top of the boxes indicate the 25th and 75th percentiles, and the whiskers indicate the 5th and 95th percentiles, x marks outliers, n=6-10 per group of adiposity/fetal sex.
